# Supplementary material for: Rational use and reuse of Nafion 212 membrane in vanadium flow batteries
Source: Royal Society of Chemistry journal article supplement (doi:10.1039/c7ra00294g), 2017-01-01
Supplement: c7ra00294g1.pdf [file c7ra00294g1.pdf]

## Electronic Supplementary Information

### Rational use and reuse of Nafion 212 membrane in vanadium flow batteries

Ying Zhou,<sup>a,b</sup> Lihong Yu,<sup>\*c</sup> Jianshe Wang,<sup>d</sup> Le Liu,<sup>b</sup> Feng Liang,<sup>\*a</sup> and Jingyu Xi<sup>\*b</sup>

*<sup>a</sup> The State Key Laboratory for Refractories and Metallurgy, School of Chemistry and Chemical Engineering, Wuhan University of Science and Technology, Wuhan 430081, China. E-mail: feng\_liang@wust.edu.cn*

*<sup>b</sup> Institute of Green Chemistry and Energy, Graduate School at Shenzhen, Tsinghua University, Shenzhen 518055, China. E-mail: xijy@tsinghua.edu.cn*

*<sup>c</sup> School of Applied Chemistry and Biological Technology, Shenzhen Polytechnic, Shenzhen 518055, China. E-mail: yulihong@szptu.edu.cn*

*<sup>d</sup> School of Chemical Engineering and Energy, Zhengzhou University, Zhengzhou 450000, China*

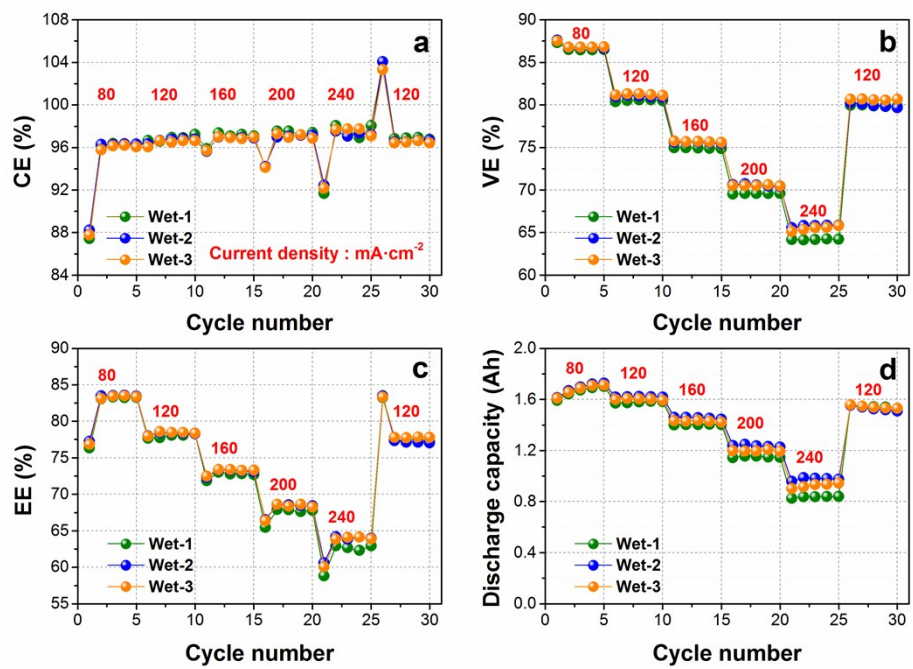

**Fig. S1.** Rate performances of three parallel wet N212: (a) CE, (b) VE, (c) EE, and (d) discharge capacity.

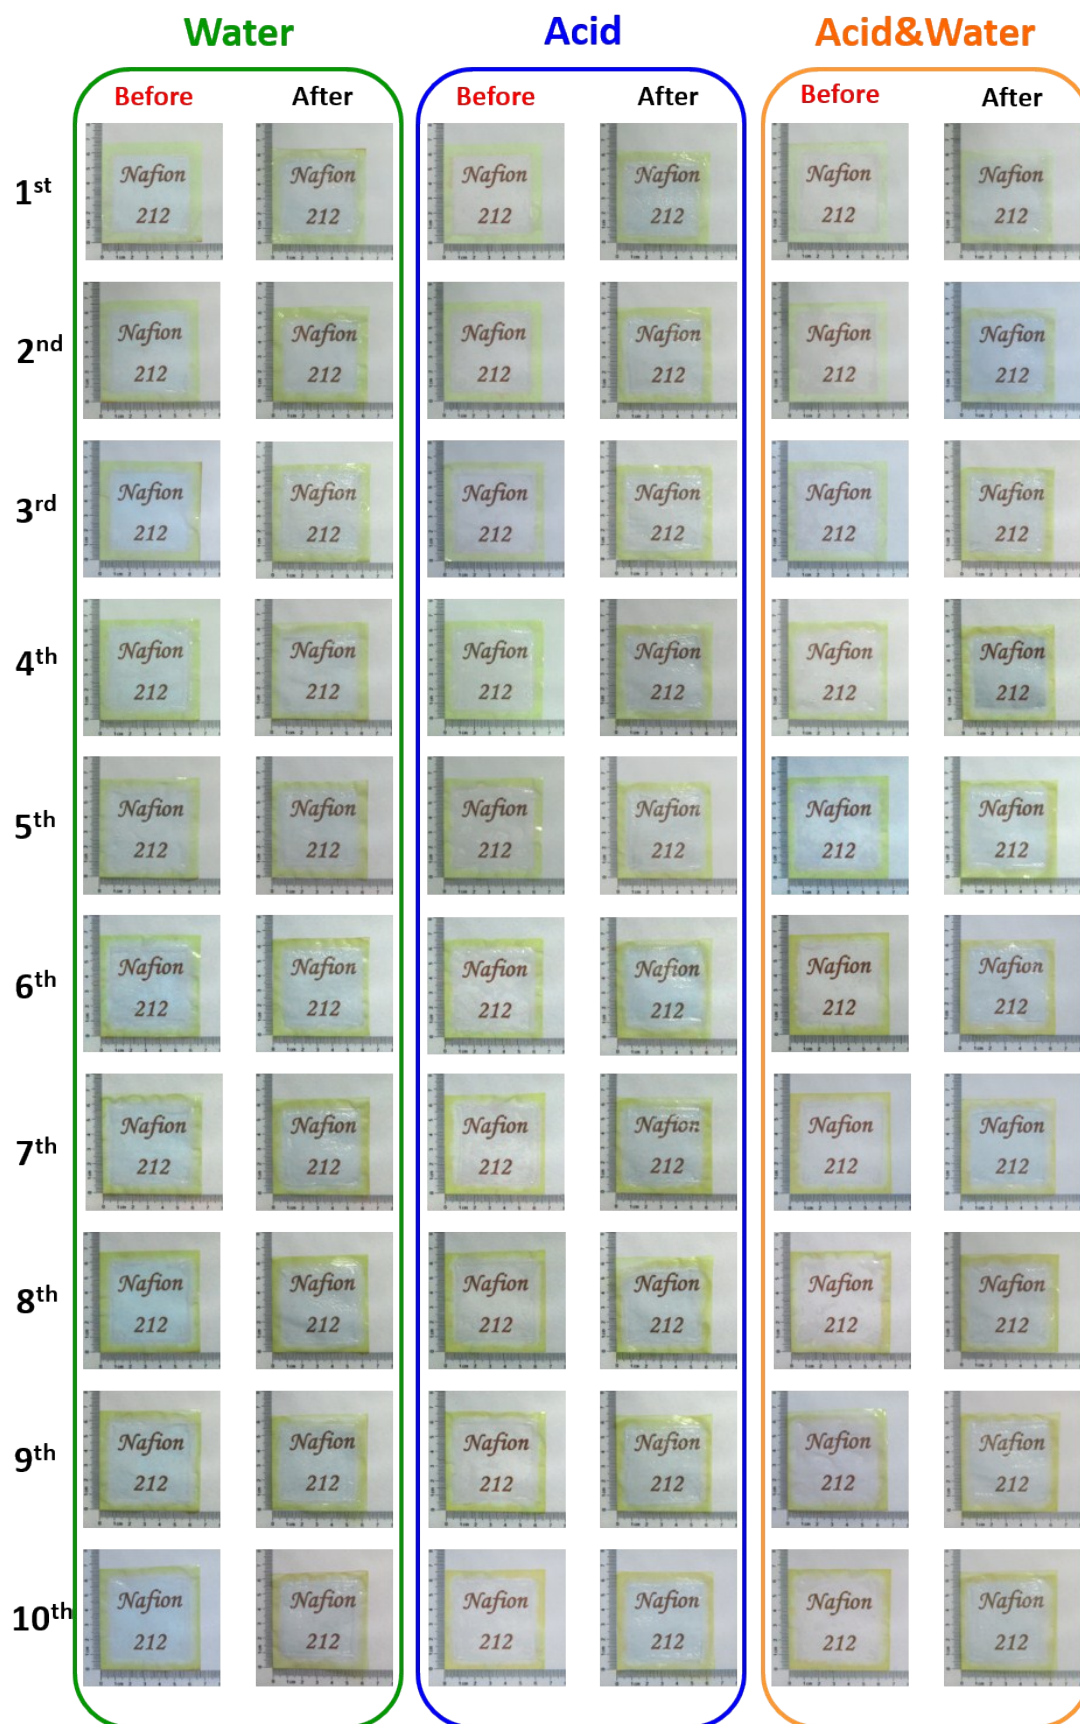

Fig. S2. Digital photos of N212 under various recover methods in ten rounds of repeated using.

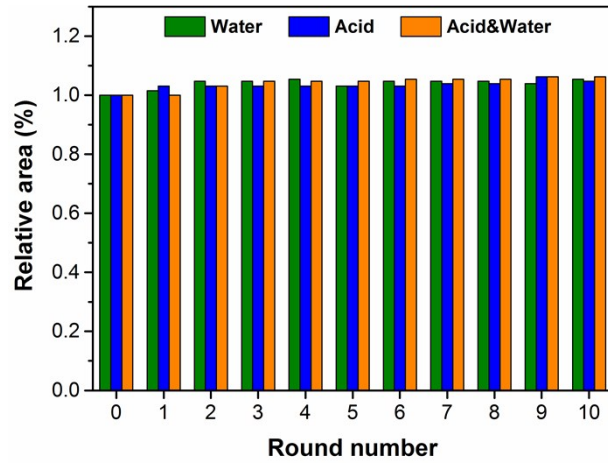

**Fig. S3.** The dimensional stability of N212 during ten rounds of testing. Round number 0 corresponds to the fresh wet N212.

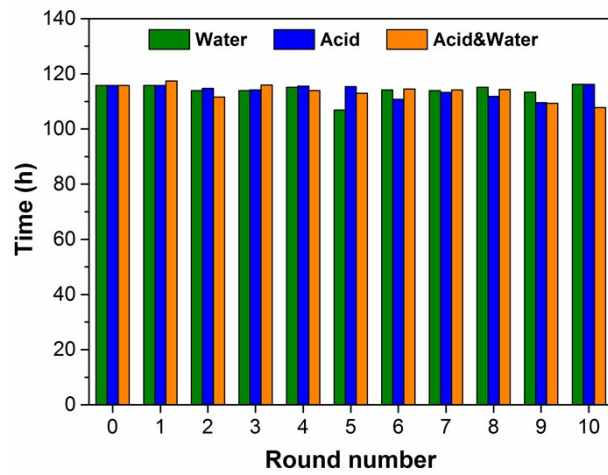

**Fig. S4.** Running time of used N212 in ten rounds of testing. Round number 0 corresponds to the fresh wet N212.
